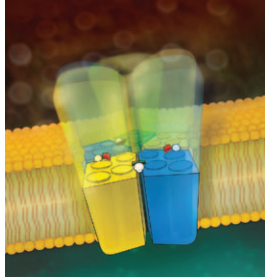

## ON THE COVER:

$\gamma$ -Aminobutyric acid type A (GABA<sub>A</sub>) receptors mediate important effects of intravenous general anesthetics. Prior studies have defined the detailed molecular structure of this voltage-gated ion channel and how general anesthetics like propofol and etomidate bind to these channels. In this issue of ANESTHESIOLOGY, Nourmahnad *et al.* use mutation-based strategies combined with voltage-clamp electrophysiology to identify distinct binding sites for four intravenous anesthetics.

- Nourmahnad *et al.*: Tryptophan and Cysteine Mutations in M1 Helices of  $\alpha 1\beta 3\gamma 2L$   $\gamma$ -Aminobutyric Acid Type A Receptors Indicate Distinct Intersubunit Sites for Four Intravenous Anesthetics and One Orphan Site, p. 1144
- Jenkins and Jenkins: Anesthetic–Receptor Relationship Status: It’s Complicated, p. 1088

|                                                                                                                                                                                                                                                                                                                                                                                                                                                                                                                                                                                                                                                                                               |                                                             |
|-----------------------------------------------------------------------------------------------------------------------------------------------------------------------------------------------------------------------------------------------------------------------------------------------------------------------------------------------------------------------------------------------------------------------------------------------------------------------------------------------------------------------------------------------------------------------------------------------------------------------------------------------------------------------------------------------|-------------------------------------------------------------|
| ◆ THIS MONTH IN ANESTHESIOLOGY                                                                                                                                                                                                                                                                                                                                                                                                                                                                                                                                                                                                                                                                | 1A                                                          |
| ■ SCIENCE, MEDICINE, AND THE ANESTHESIOLOGIST                                                                                                                                                                                                                                                                                                                                                                                                                                                                                                                                                                                                                                                 | 15A                                                         |
| ■ INFOGRAPHICS IN ANESTHESIOLOGY                                                                                                                                                                                                                                                                                                                                                                                                                                                                                                                                                                                                                                                              | 17A                                                         |
| ◆ EDITORIAL VIEWS                                                                                                                                                                                                                                                                                                                                                                                                                                                                                                                                                                                                                                                                             |                                                             |
| <p><b>Protective Ventilation during Anesthesia: Is It Meaningful?</b><br/><i>G. Hedenstierna and L. Edmark</i></p> <p><b>Do Not Use Hierarchical Logistic Regression Models with Low-incidence Outcome Data to Compare Anesthesiologists in Your Department</b><br/><i>F. Dexter and B. J. Hindman</i></p> <p><b>CYP2B6*6 or Not CYP2B6*6—That Remains a Question for Precision Medicine and Ketamine!</b><br/><i>S. D. Cook-Sather, P. C. Adamson, J. Li, and H. Hakonarson</i></p> <p><b>Anesthetic–Receptor Relationship Status: It’s Complicated</b><br/><i>M. A. Jenkins and A. Jenkins</i></p> <p><b>Anesthesia Kills Brain Cells, but What Does It Mean?</b><br/><i>J. W. Sall</i></p> | <p>1079</p> <p>1083</p> <p>1085</p> <p>1088</p> <p>1090</p> |
| ■ PERIOPERATIVE MEDICINE                                                                                                                                                                                                                                                                                                                                                                                                                                                                                                                                                                                                                                                                      |                                                             |
| CLINICAL SCIENCE                                                                                                                                                                                                                                                                                                                                                                                                                                                                                                                                                                                                                                                                              |                                                             |
| <p>◆ <b>Quality of Quality Measurement: Impact of Risk Adjustment, Hospital Volume, and Hospital Performance</b><br/><i>L. G. Glance, Y. Li, and A. W. Dick</i></p>                                                                                                                                                                                                                                                                                                                                                                                                                                                                                                                           | 1092                                                        |

Using Monte Carlo simulation, nonhierarchical modeling frequently misclassified average-quality hospitals as low quality, whereas hierarchical modeling commonly misclassified low-quality hospitals as average.

|                                                                                                                              |                                                                                                        |
|------------------------------------------------------------------------------------------------------------------------------|--------------------------------------------------------------------------------------------------------|
| <p>◆ Refers to This Month in Anesthesiology</p> <p>◆ Refers to Editorial Views</p> <p> This article has an Audio Podcast</p> | <p> See Supplemental Digital Content</p> <p> CME Article</p> <p> This article has a Video Abstract</p> |
|------------------------------------------------------------------------------------------------------------------------------|--------------------------------------------------------------------------------------------------------|

- ◆◆ **Role of Cytochrome P4502B6 Polymorphisms in Ketamine Metabolism and Clearance** 1103  
*L. K. Rao, A. M. Flaker, C. C. Friedel, and E. D. Kharasch*  
 Healthy volunteers with *CYP2B6*\*1/\*1, \*1/\*6, or \*6/\*6 genotypes received a single oral ketamine dose. There was no significant difference between *CYP2B6* genotypes in ketamine or norketamine plasma concentrations or ketamine metabolism.
- ◆ **Effectiveness of an Electronic Alert for Hypotension and Low Bispectral Index on 90-day Postoperative Mortality: A Prospective, Randomized Trial** 1113  
 *P. J. McCormick, M. A. Levin, H.-M. Lin, D. I. Sessler, and D. L. Reich*  
 In a randomized trial of over 19,000 patients, the duration of double low was slightly reduced when alarms occurred during this condition, but 90-day mortality was not affected.
- ◆ **Perioperative Aspirin for Prevention of Venous Thromboembolism: The PeriOperative ISchema Evaluation-2 Trial and a Pooled Analysis of the Randomized Trials** 1121  
 *J. W. Eikelboom, C. Kearon, G. Guyatt, D. I. Sessler, S. Yusuf, D. Cook, J. Douketis, A. Patel, A. Kurz, R. Allard, P. M. Jones, R. J. Dennis, T. W. Painter, S. D. Bergese, K. Leslie, D. N. Wijeyesundera, K. Balasubramanian, E. Duceppe, S. Miller, J. Diedericks, and P. J. Devereaux*  
 From a large database of 10,010 patients undergoing noncardiac surgery who received 200 mg aspirin or placebo 2 to 4 h before surgery and then 100 mg aspirin daily or placebo for up to 30 days postoperatively, it was found that aspirin did not reduce venous thromboembolism. However, two thirds of the patients also received anticoagulant prophylaxis, and there were few venous thromboembolism events overall.
- Median Effective Dose of Intranasal Dexmedetomidine for Rescue Sedation in Pediatric Patients Undergoing Magnetic Resonance Imaging** 1130  
*W. Zhang, Y. Fan, T. Zhao, J. Chen, G. Zhang, and X. Song*  
 The median effective dose of intranasal dexmedetomidine for rescue sedation after failed chloral hydrate was determined and found to increase with age during the initial 3 yr of life.
- ◆ **Dose–response and Cardiopulmonary Side Effects of the Novel Neuromuscular-blocking Drug CW002 in Man** 1136  
*P. M. Heerd, H. Sunaga, J. S. Owen, M. T. Murrell, J. K. Malhotra, D. Godfrey, M. Steinkamp, P. Savard, J. J. Savarese, and C. A. Lien*  
 CW002 is a relatively potent nondepolarizing neuromuscular-blocking agent with a duration of action less than 40 min at  $-1.8\times$  the  $ED_{95}$ . During the dose range studied, CW002 elicited no histamine release and had minimal cardiopulmonary effects.
- BASIC SCIENCE**
- ◆◆ **Tryptophan and Cysteine Mutations in M1 Helices of  $\alpha 1\beta 3\gamma 2L$   $\gamma$ -Aminobutyric Acid Type A Receptors Indicate Distinct Intersubunit Sites for Four Intravenous Anesthetics and One Orphan Site** 1144  
 *A. Nourmahnad, A. T. Stern, M. Hotta, D. S. Stewart, A. M. Ziemba, A. Szabo, and S. A. Forman*  
 Complementary structure–function studies involving site-directed mutagenesis of amino acid residues lining the five predicted intersubunit binding pockets in a typical  $\gamma$ -aminobutyric acid type A receptor show that four intravenous anesthetics have distinct but overlapping patterns of interaction with the receptor. These findings validate previous anesthetic photolabeling findings and further define the properties of the distinct sites that mediate the potentiating effects of various intravenous anesthetics with  $\gamma$ -aminobutyric acid type A receptors.
- ◆◆ **Long-term Fate Mapping to Assess the Impact of Postnatal Isoflurane Exposure on Hippocampal Progenitor Cell Productivity** 1159  
*Y. Jiang, D. Tong, R. D. Hofacer, A. W. Loepke, Q. Lian, and S. C. Danzer*  
 As expected, isoflurane increased apoptosis of granule cells of the dentate gyrus. Changes in neurogenesis were not detected. There were no differences in the density of labeled granule cells in adult animals. The data are consistent with the premise that the neuron number in the dentate gyrus can be restored after anesthetic-induced cell loss. The mechanism remains to be found.

## CONTENTS

### 🌐 **Transient Receptor Potential Ankyrin 1 Activation within the Cardiac Myocyte Limits Ischemia–reperfusion Injury in Rodents** 1171

*Y. Lu, H. Piplani, S. L. McAllister, C. M. Hurt, and E. R. Gross*

The authors report that the transient receptor potential ankyrin 1 (TRPA1) receptors exist within the cardiac myocyte, and TRPA1 activation protects the heart from myocardial ischemia–reperfusion injury. The results reported have the potential to impact novel targets for cardiac protection and have significant implications regarding the safety of TRPA1 antagonists being developed as pain medications.

## ■ CRITICAL CARE MEDICINE

### CLINICAL SCIENCE

### **New Setting of Neurally Adjusted Ventilatory Assist during Noninvasive Ventilation through a Helmet** 1181

*G. Cammarota, F. Longhini, R. Perucca, C. Ronco, D. Colombo, A. Messina, R. Vaschetto, and P. Navalesi*

Pressure support (PS) ventilation with a helmet was studied after extubation in 15 patients. Neurally adjusted PS increased comfort and improved patient–ventilator interactions when compared with standard (pneumatic) PS or neurally adjusted ventilatory assist.

### BASIC SCIENCE

### 🌐 **Heme Oxygenase-1/Carbon Monoxide-regulated Mitochondrial Dynamic Equilibrium Contributes to the Attenuation of Endotoxin-induced Acute Lung Injury in Rats and in Lipopolysaccharide-activated Macrophages** 1190

*J. Yu, J. Shi, D. Wang, S. Dong, Y. Zhang, M. Wang, L. Gong, Q. Fu, and D. Liu*

Using isolated cell and *in vivo* models, it was found that heme oxygenase-1 regulates mitochondrial dynamic equilibrium in the setting of lipopolysaccharide injury, and this contributes to a negative feedback loop that dampens endotoxin-induced acute lung injury.

## ■ PAIN MEDICINE

### BASIC SCIENCE

### 🌐 **Neurosteroid Allopregnanolone Suppresses Median Nerve Injury–induced Mechanical Hypersensitivity and Glial Extracellular Signal–regulated Kinase Activation through $\gamma$ -Aminobutyric Acid Type A Receptor Modulation in the Rat Cuneate Nucleus** 1202

*C.-T. Huang, S.-H. Chen, J.-H. Lue, C.-F. Chang, W.-H. Wen, and Y.-J. Tsai*

Median nerve injury in rats leads to the activation of glia and production of pronociceptive cytokines in the cuneate nucleus. The endogenous neurosteroid allopregnanolone moderates glial activation after nerve injury, thus reducing cytokine production and nociceptive sensitization.

## ■ EDUCATION

### IMAGES IN ANESTHESIOLOGY

### **Skin Mottling after Induction** 1219

*E. E. Naoum, L. S. Oh, and W. C. Levine*

### **Portal Catheter Fracture in a Pediatric Patient** 1220

*A. Van Meter, A. Zavala, U. U. Williams, and P. Owusu-Agyemang*

## ORIGINAL INVESTIGATIONS IN EDUCATION

- ◇ **Appropriateness of Language Used in Patient Educational Materials from 24 National Anesthesiology Associations** 1221

*D. Govender, A. Villafranca, C. Hamlin, B. Hiebert, D. Parveen, and E. Jacobsohn*

Twenty-four national anesthesia society Web sites were explored, and 67% provided online information. All material was above grade 8 level (*i.e.*, too complex for lay comprehension), especially text describing the anesthesiologist's role. Such materials should be simplified and validated.

## CLINICAL CONCEPTS AND COMMENTARY

- ◆ **Intensive Care Unit Delirium: A Review of Diagnosis, Prevention, and Treatment** 1229

*C. J. Hayhurst, P. P. Pandharipande, and C. G. Hughes*

This review examines the most recent evidence for the diagnosis, prevention, and treatment of delirium in the ICU.

## MIND TO MIND

- Going Home** 1242

*A. M. Kowalski*

- A Proper Burial** 1244

*B. D. Sites*

## CORRESPONDENCE

- Pure Science or Purely Biased** 1246

*W. J. Levy*

- High *versus* Low Technology in Assessment of Endotracheal Tube Position** 1246

*H.-J. Priebe*

- “We Hear What You Are Saying, but...”** 1247

*D. L. Hester and S. T. Harvey*

- Detection of Inadvertent Endobronchial Intubation** 1248

*M. El-Orbany*

- The Value of the Stethoscope in the Era of Ultrasound** 1248

*M. L. Jablons*

**In Reply**

*S. Isono, W. S. Sandberg, and Y. Jiang*

**In Reply**

*D. Ramsingh and M. Cannesson*

- 
- Assessing the Effect of Exogenous Albumin on the Incidence of Postoperative Acute Kidney Injury in Patients Undergoing Off-pump Coronary Artery Bypass Surgery** 1251

*W. Zhang and F. Xue*

**In Reply**

*E.-H. Lee and I.-C. Choi*

- 
- Complications of One-lung Ventilation: Is It the Blood Flow or the Ventilation?** 1253

*J. V. Roth*

- Selecting the Level of Positive End-expiratory Pressure for One-lung Ventilation: “By Formula” or “By Feel”?** 1254

*J. Pfitzner*

## INSTRUCTIONS FOR AUTHORS

The most recently updated version of the Instructions for Authors is available at [www.anesthesiology.org](http://www.anesthesiology.org). Please refer to the Instructions for the preparation of any material for submission to ANESTHESIOLOGY.

Manuscripts submitted for consideration for publication must be submitted in electronic format. The preferred method is via the Journal's Web site (<http://www.anesthesiology.org>). Detailed directions for submissions and the most recent version of the Instructions for Authors can be found on the Web site (<http://www.anesthesiology.org>). Books and educational materials should be sent to Alan Jay Schwartz M.D., M.S.Ed., Director of Education, Department of Anesthesiology and Critical Care Medicine, The Children's Hospital of Philadelphia, 34th Street and Civic Center Blvd., Room 9327, Philadelphia, Pennsylvania 19104-4399. Requests for permission to duplicate materials published in ANESTHESIOLOGY should be submitted in electronic format, to the Permissions Department ([journalpermissions@lww.com](mailto:journalpermissions@lww.com)). Advertising and related correspondence should be addressed to Advertising Manager, ANESTHESIOLOGY, Wolters Kluwer Health, Inc., Two Commerce Square, 2001 Market Street, Philadelphia, Pennsylvania 19103 (Web site: <http://www.wkadcenter.com/>). Publication of an advertisement in ANESTHESIOLOGY does not constitute endorsement by the Society or Wolters Kluwer Health, Inc. of the product or service described therein or of any representations made by the advertiser with respect to the product or service.

**ANESTHESIOLOGY** (ISSN 0003-3022) is published monthly by Wolters Kluwer Health, Inc., 14700 Citicorp Drive, Bldg 3, Hagerstown, MD 21742. Business office: Two Commerce Square, 2001 Market Street, Philadelphia, PA 19103. Periodicals postage paid at Hagerstown, MD, and at additional mailing offices. Copyright © 2016, the American Society of Anesthesiologists, Inc.

**Annual Subscription Rates:** *United States*—\$981 Individual, \$1876 Institution, \$354 In-training. *Rest of World*—\$930 Individual, \$2084 Institution, \$354 In-training. Single copy rate \$189. Subscriptions outside of North America must add \$54 for airfreight delivery. Add state sales tax, where applicable. The GST tax of 7% must be added to all orders shipped to Canada (Lippincott Williams & Wilkins' GST Identification #895524239, Publications Mail Agreement #1119672). Indicate in-training status and name of institution. Institution rates apply to libraries, hospitals, corporations, and partnerships of three or more individuals. Subscription prices outside the United States must be prepaid. Prices subject to change without notice. Subscriptions will begin with currently available issue unless otherwise requested. Visit us online at [www.lww.com](http://www.lww.com).

Individual and in-training subscription rates include print and access to the online version. Online-only subscriptions for individuals (\$301) and persons in training (\$301) are available to nonmembers and may be ordered by downloading a copy of the Online Subscription FAXback Form from the Web site, completing the information requested, and faxing the completed form to 301-223-2400/44 (0) 20 7981 0535. Institutional rates are for print only; online subscriptions are available via Ovid. Institutions can choose to purchase a print and online subscription together for a discounted rate. Institutions that wish to purchase a print subscription, please contact Wolters Kluwer Health, Inc., 14700 Citicorp Drive, Bldg 3, Hagerstown, MD 21742; phone: 1-800-638-3030 (outside the United States 301-223-2300/44 (0) 20 7981 0525); fax: 301-223-2400/44 (0) 20 7981 0535. Institutions that wish to purchase an online subscription or online with print, please contact the Ovid Regional Sales Office near you or visit [www.ovid.com/site/index.jsp](http://www.ovid.com/site/index.jsp) and select Contact and Locations.

**Address for non-member subscription information, orders, or change of address:** Wolters Kluwer Health, Inc., 14700 Citicorp Drive, Bldg 3, Hagerstown, MD 21742; phone: 1-800-638-3030 (outside the United States 301-223-2300/44 (0) 20 7981 0525); fax: 301-223-2400/44 (0) 20 7981 0535; email: [customerservice@lww.com](mailto:customerservice@lww.com). In Japan, contact LWW Japan Ltd., 3-23-14 Hongo, Bunkyo-ku, Tokyo 113, Japan; phone: 81-3-5689-5400; fax: 81-3-5689-5402; email: [bclaim@lwwis.co.jp](mailto:bclaim@lwwis.co.jp). In Bangladesh, India, Nepal, Pakistan, and Sri Lanka, contact Globe Publications Pvt. Ltd., B-13 3rd Floor, A Block, Shopping Complex, Naraina, Vihar, Ring Road, New Delhi 110028, India; phone: 91-11-25770411; fax: 91-11-25778876; email: [info@globepub.com](mailto:info@globepub.com).

**Address for member subscription information, orders, or change of address:** Members of the American Society of Anesthesiologists receive the print and online journal with their membership. To become a member or provide a change of address, please contact the American Society of Anesthesiologists, 1061 American Lane, Schaumburg, Illinois 60173-4973; phone: 847-825-5586; fax: 847-825-1692; email: [membership@ASAhq.org](mailto:membership@ASAhq.org). For all other membership inquiries, contact Wolters Kluwer Health, Inc., Customer Service Department, P.O. Box 1610, Hagerstown, MD 21740; phone: 1-800-638-3030 (outside the United States 301-223-2300/44 (0) 20 7981 0525); fax: 301-223-2400/44 (0) 20 7981 0535; email: [memberservice@lww.com](mailto:memberservice@lww.com).

**Postmaster:** Send address changes to ANESTHESIOLOGY, P.O. BOX 1610, Hagerstown, MD 21740.

**Advertising:** Please contact Ryan Magee, National Sales Manager, Product & Services Advertising, Journals and Websites, Wolters Kluwer Health, Inc., Lippincott Williams & Wilkins, Two Commerce Square, Philadelphia, PA 19103; tel: (215) 521-8804, fax: (215) 521-8801, e-mail: [Ryan.Magee@wolterskluwer.com](mailto:Ryan.Magee@wolterskluwer.com). For classified advertising: Joe Anzuena, Recruitment Advertising Representative, Wolters Kluwer Health, Inc., Lippincott Williams & Wilkins, Two Commerce Square, 2001 Market Street, Philadelphia, PA 19103; tel: (215) 521-8532, fax: (215) 701-2410. e-mail: [Joe.Anzuena@wolterskluwer.com](mailto:Joe.Anzuena@wolterskluwer.com).
